# Supplementary figures and images for: Loss of Feedback Inhibition via D2 Autoreceptors Enhances Acquisition of Cocaine Taking and Reactivity to Drug-Paired Cues
Source: PubMed Central journal article supplement — Neuropsychopharmacology. 2015 Jan 21;40(6):1495–509. doi: 10.1038/npp.2014.336 (PMC4397408; doi:10.1038/npp.2014.336), 2015-01-21

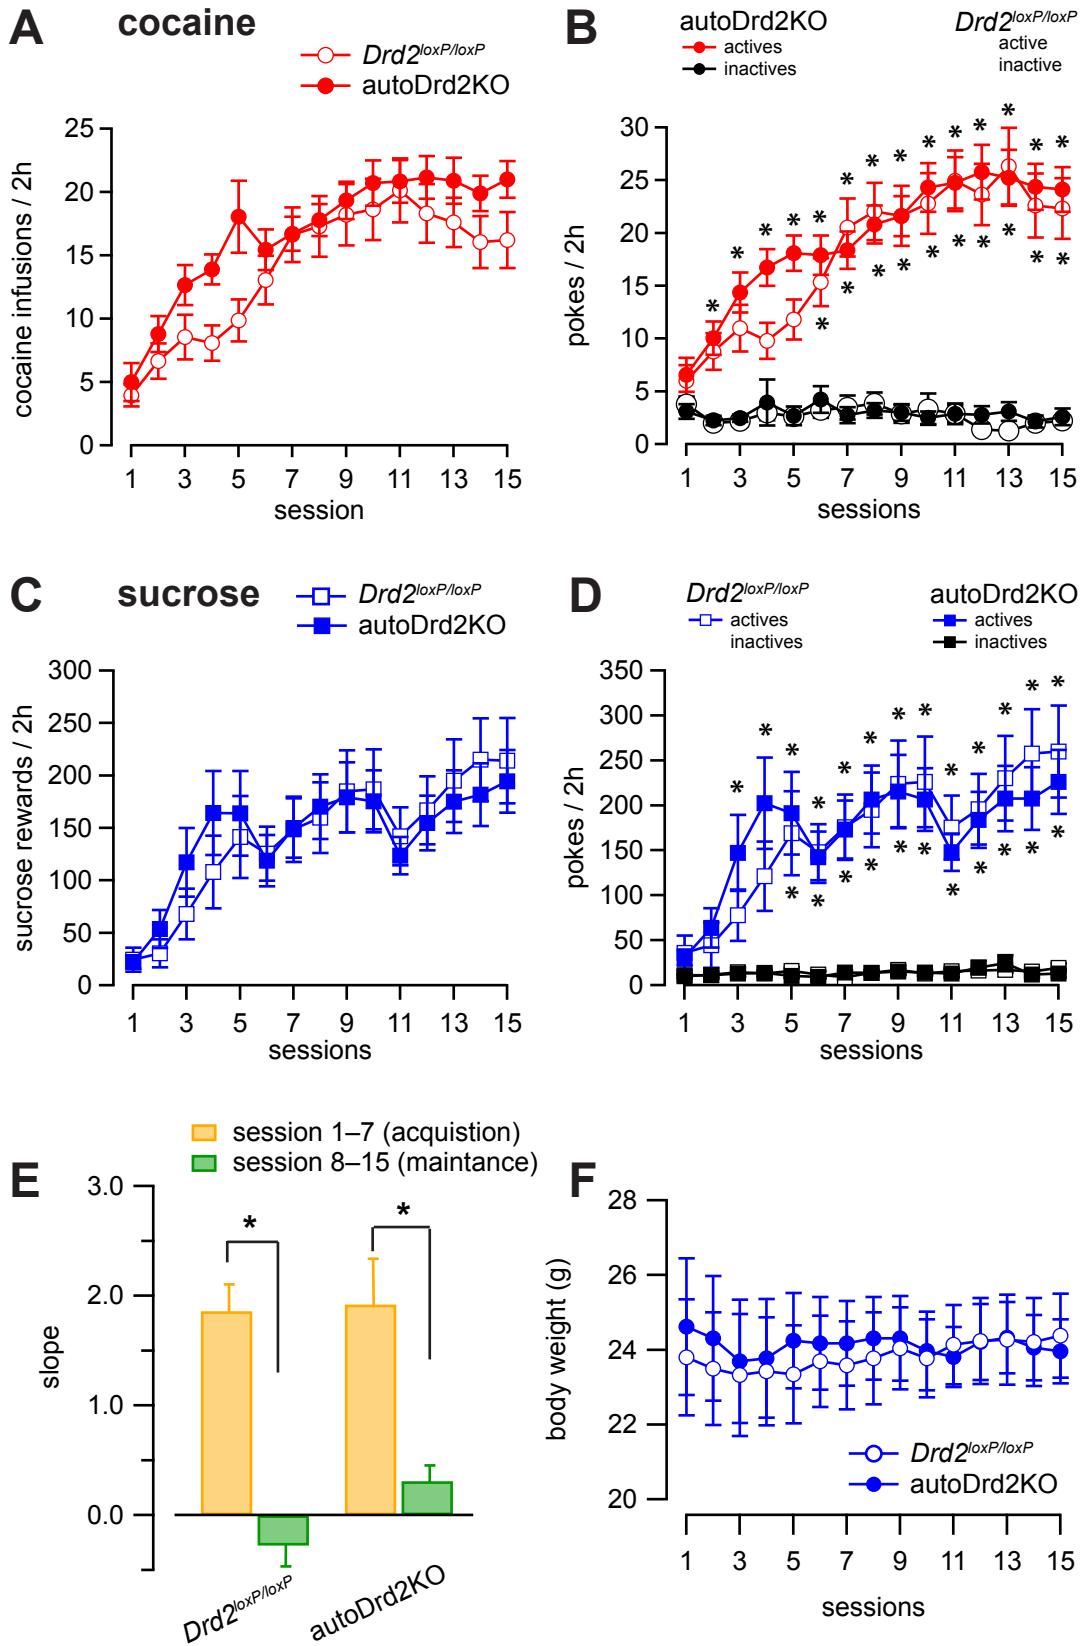

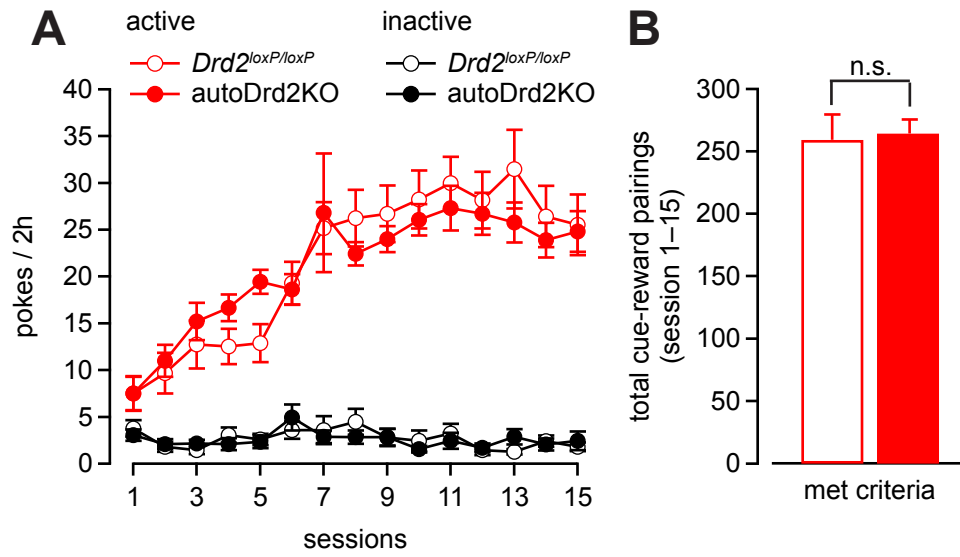

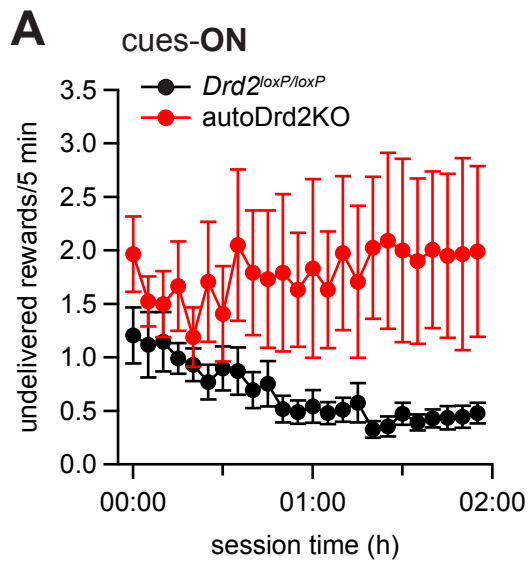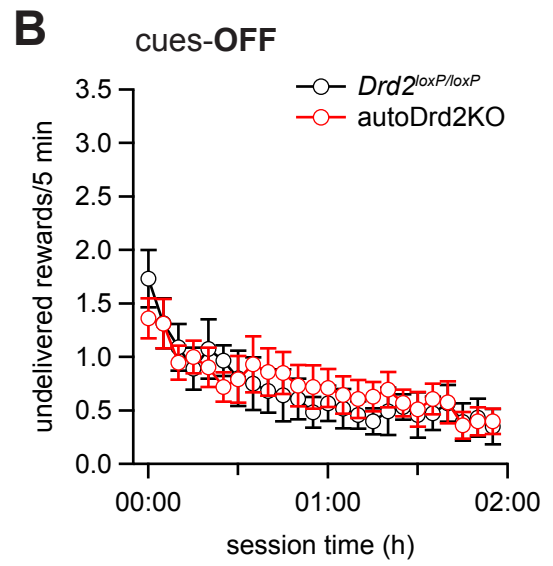

**A**

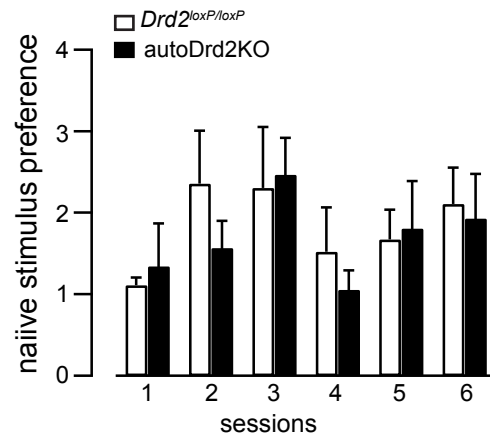

Supplement: npp2014336x1.pdf [file npp2014336x1.pdf]
